# Supplementary material for: PSGL-1 is a novel tumor microenvironment prognostic biomarker with cervical high-grade squamous lesions and more
Source: PubMed Central journal article supplement (PMC10030516; doi:10.3389/fonc.2023.1052201), 2023-03-08
Supplement: Table_1.pdf [file Table_1.pdf]

**Table S1. Clinical characteristics of the cervical cancers in TCGA datasets**

| Characteristic    | Low expression of SELPLG | High expression of SELPLG | p     |
|-------------------|--------------------------|---------------------------|-------|
| n                 | 153                      | 153                       |       |
| T stage, n (%)    |                          |                           | 0.276 |
| T1                | 66 (27.2%)               | 74 (30.5%)                |       |
| T2                | 29 (11.9%)               | 43 (17.7%)                |       |
| T3                | 13 (5.3%)                | 8 (3.3%)                  |       |
| T4                | 6 (2.5%)                 | 4 (1.6%)                  |       |
| N stage, n (%)    |                          |                           | 0.552 |
| N0                | 56 (28.7%)               | 78 (40%)                  |       |
| N1                | 29 (14.9%)               | 32 (16.4%)                |       |
| M stage, n (%)    |                          |                           | 0.530 |
| M0                | 49 (38.6%)               | 67 (52.8%)                |       |
| M1                | 6 (4.7%)                 | 5 (3.9%)                  |       |
| Age, median (IQR) | 47 (39, 57)              | 46 (38, 56)               | 0.448 |
